# Supplementary figures and images for: Attenuated migration by green tea extract (−)-epigallocatechin gallate (EGCG): involvement of 67 kDa laminin receptor internalization in macrophagic cells
Source: Royal Society of Chemistry journal article supplement (doi:10.1039/c4fo00143e), 2014-01-01

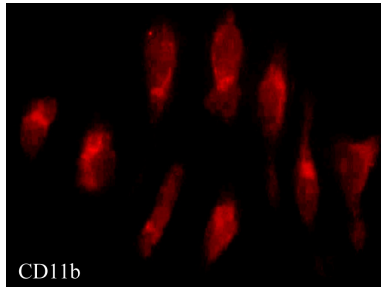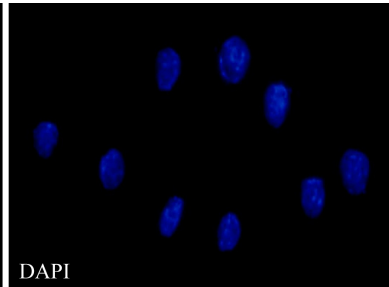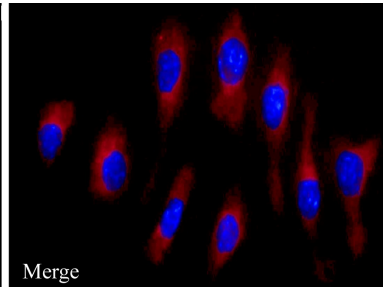

Supplement: c4fo00143e1.pdf [file c4fo00143e1.pdf]
